# THE AMERICAN JOURNAL OF PSYCHIATRY

March 2008

Vol. 165, No. 3:293-410

THE AMERICAN JOURNAL OF PSYCHIATRY

**A Depressed Adolescent at High Risk for Suicidal Behavior**  
Benedetto Vitiello 323

**Augmentation of Behavior Therapy with D-Cycloserine for Obsessive-Compulsive Disorder**  
Sabine Wilhelm et al. 335

**The Prospective Course of Rapid Cycling Bipolar Disorder: Findings From the STEP-BD**  
Christopher Schneck et al. 370

**Acute Effect of Methadone Maintenance Dose on Brain fMRI Response to Heroin-Related Cues**  
Daniel Langleben et al. 390

**Continuing Medical Education** 407

March 2008

Volume 165 • Number 3

Official Journal of the  
AMERICAN PSYCHIATRIC ASSOCIATION

[ajp.psychiatryonline.org](http://ajp.psychiatryonline.org)

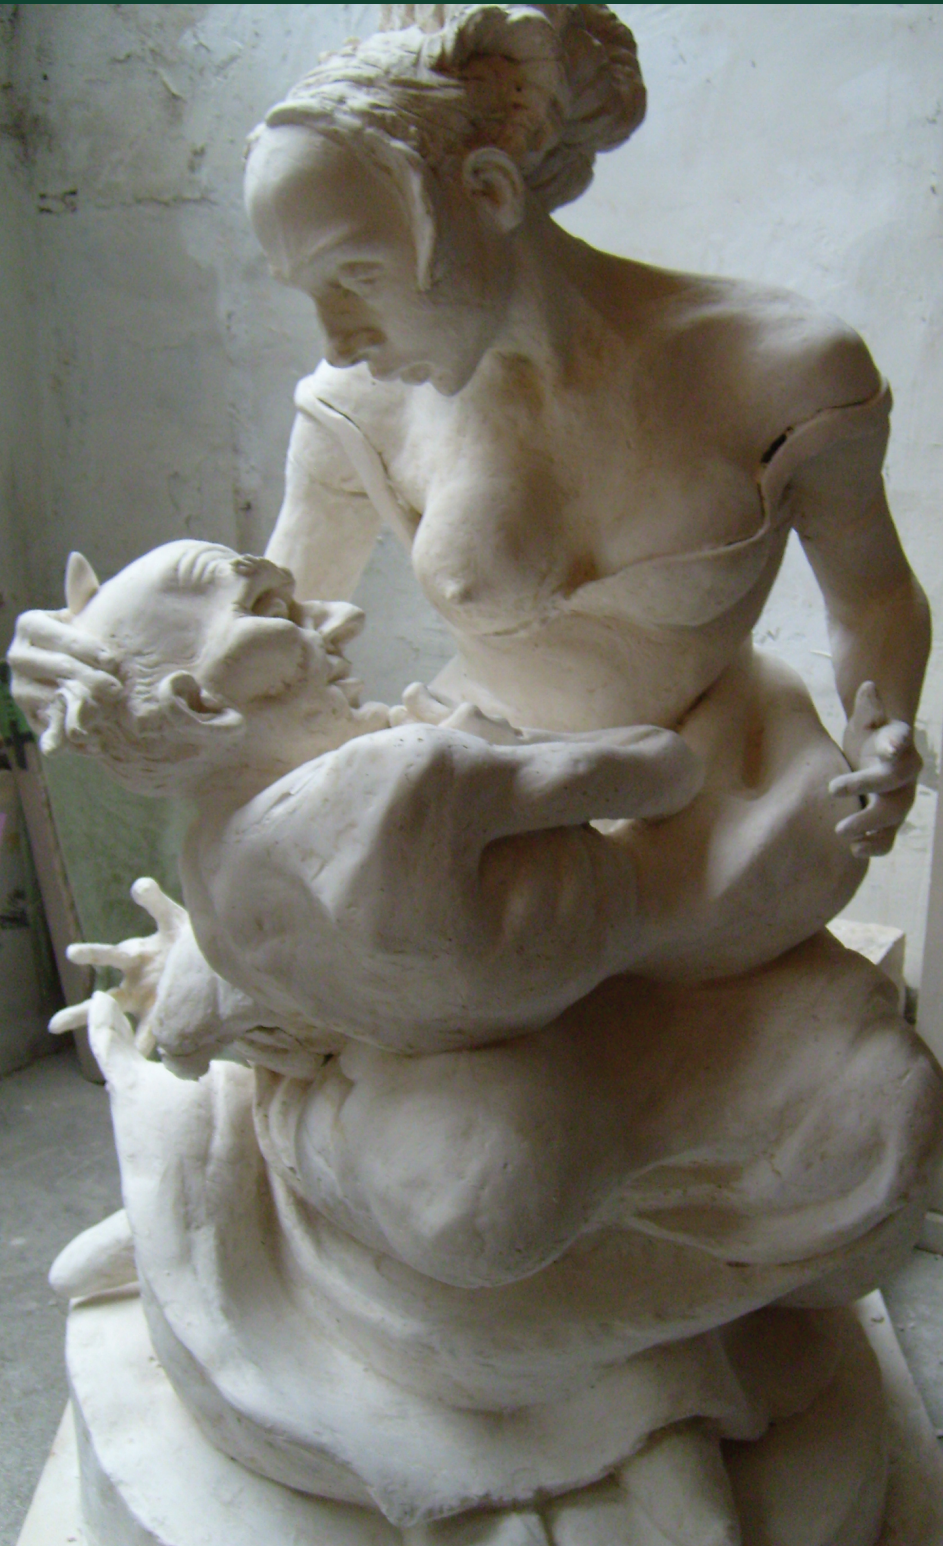

Source: https://psychiatryonline.org/doi/suppl/10.1176/ajp.2008.165.issue-3/suppl_file/cover.pdf
