# THE AMERICAN JOURNAL OF PSYCHIATRY

March 2008

Vol. 165, No. 3:293-410

THE AMERICAN JOURNAL OF PSYCHIATRY

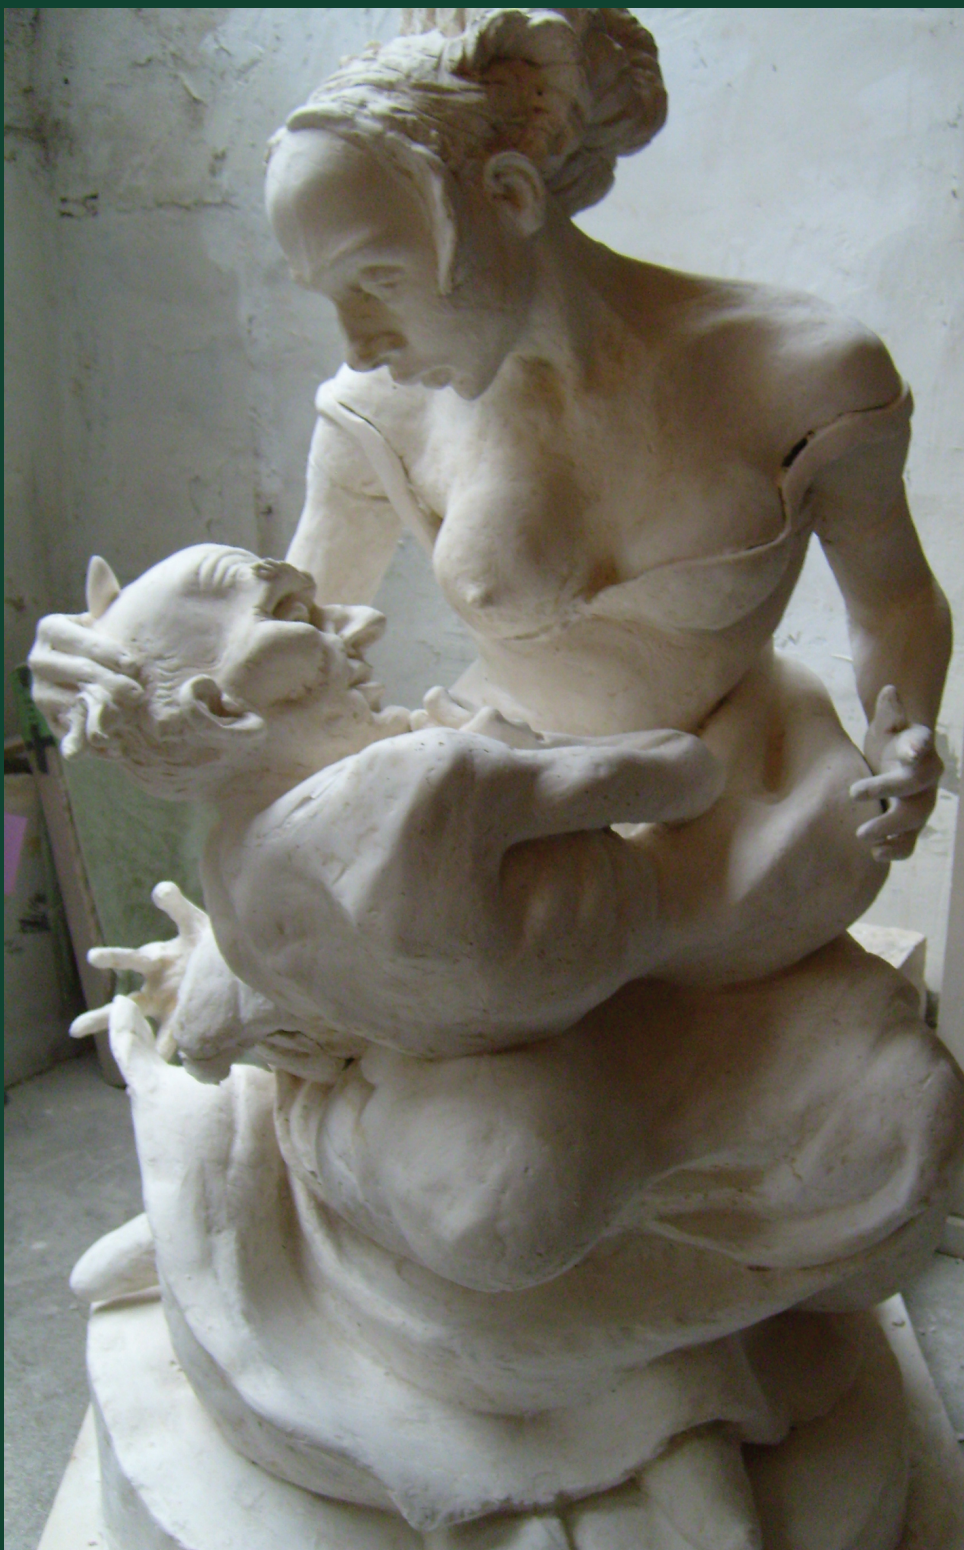

**A Depressed Adolescent at High Risk for Suicidal Behavior**  
Benedetto Vitiello 323

**Augmentation of Behavior Therapy with D-Cycloserine for Obsessive-Compulsive Disorder**  
Sabine Wilhelm et al. 335

**The Prospective Course of Rapid Cycling Bipolar Disorder: Findings From the STEP-BD**  
Christopher Schneck et al. 370

**Acute Effect of Methadone Maintenance Dose on Brain fMRI Response to Heroin-Related Cues**  
Daniel Langleben et al. 390

**Continuing Medical Education** 407

March 2008

Volume 165 • Number 3

Official Journal of the  
AMERICAN PSYCHIATRIC ASSOCIATION

[ajp.psychiatryonline.org](http://ajp.psychiatryonline.org)

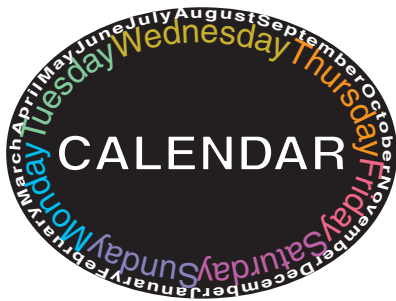

For free listing of your organization's official annual or regional meeting, please send us the following information: sponsor, location, inclusive dates, type and number of continuing education credits (if available), and the name, address, and telephone number of the person or group to contact for more information. In order for an event to appear in our listing, all notices and changes must be received at least 6 months in advance of the meeting and should be addressed to:

Calendar, American Journal of Psychiatry, 1000 Wilson Boulevard, Suite 1825, Arlington, VA 22209-3901, [jblair@psych.org](mailto:jblair@psych.org) (e-mail).

Because of space limitations, only listings of meetings of the greatest interest to Journal readers will be included.

## MARCH

**March 1–4**, 19th Annual Meeting of the American Neuropsychiatric Association, Savannah, GA. Contact: ANPA Office; (614) 447-2077 (tel), (614) 263-4366 (fax), [anpa@osu.edu](mailto:anpa@osu.edu) (e-mail), [www.anpaonline.org](http://www.anpaonline.org) (web site).

**March 14–17**, 21st Annual Meeting of the American Association for Geriatric Psychiatry, Orlando. Contact: AAGP, 7910 Woodmont Ave., Ste. 1050, Bethesda, MD 20814-3004; (301) 654-7850 (tel), (301) 654-4137 (fax), [www.aagpmeeting.org](http://www.aagpmeeting.org) (web site).

**March 15**, 7th Annual Women's Mental Health Symposium, Tucson, AZ. Contact: Professional Development Office, University of Arizona College of Medicine, Department of Psychiatry, PO Box 245002, 1501 N. Campbell Ave. #7423, Tucson, AZ 85724-5002; (520) 626-1392 (tel), (520) 626-5732 (fax), [uapsycon@email.arizona.edu](mailto:uapsycon@email.arizona.edu) (e-mail), [www.psychiatry.arizona.edu](http://www.psychiatry.arizona.edu) (web site).

**March 26–29**, Annual Meeting and Scientific Sessions of the Society of Behavioral Medicine, San Diego. Contact: Society of Behavioral Medicine, 17000 Commerce Parkway, Ste. C, Mount Laurel, NJ 08054; (856) 439-1297 (tel), (856) 439-0525 (fax), [info@sbm.org](mailto:info@sbm.org) (e-mail).

## APRIL

**April 4–5**, The Seventh Annual Pharmacogenetics in Psychiatry Meeting, New York, NY. Contact: Patricia Raikos, The Zucker Hillside Hospital, 75-59 263rd Street, Glen Oaks, NY 11004; (718) 470-8418 (tel), (718) 343-1659 (fax), [praikos@nshs.edu](mailto:praikos@nshs.edu) (e-mail), [www.pharmacogeneticsinpsychiatry.com](http://www.pharmacogeneticsinpsychiatry.com) (web site).

**April 5–9**, 16th European Congress of Psychiatry, Nice, France. Contact: Congress Secretariat, Kenes International,

17 Rue du Cendrier, PO Box 1726, CH-1211 Geneva 1, Switzerland; (41) 22 908 0488 (tel), (41) 22 732 2850 (fax), [aep@kenes.com](mailto:aep@kenes.com) (e-mail).

## MAY

**May 1–4**, The 52nd Annual Meeting of the American Academy of Psychoanalysis and Dynamic Psychiatry, Washington, DC. Contact: Executive Office, American Academy of Psychoanalysis and Dynamic Psychiatry, P. O. Box 30, Bloomfield, CT 06002; (888) 691-8281 (tel), (860) 286-0787 (fax), [info@aapdp.org](mailto:info@aapdp.org) (e-mail) [www.aapdp.org](http://www.aapdp.org) (web site).

**May 3–4**, American Academy of Psychiatry and the Law Semiannual Meeting, Washington, D.C. Contact: One Regency Drive, PO Box 30, Bloomfield, CT 06002-0030; (800) 331-1389, (tel) (860) 286-0787 (fax), [execoff@aapl.org](mailto:execoff@aapl.org) (e-mail).

**May 3–8**, 161st Annual Meeting of the American Psychiatric Association, Washington, DC. Contact: Cathy Nash, APA Annual Meetings Dept., 1000 Wilson Blvd., Ste. 1825, Arlington, VA 22209; (703) 907-7822.

**May 11–14**, World Psychiatric Association Epidemiology & Public Health Section Meeting, Saskatoon, Saskatchewan. Contact: Karen E. Mosier, Saskatchewan Health Organization for Research and Evaluation (SHORE), Department of Psychiatry, Ellis Hall, Room 110; (306) 966-1840 (tel), (306) 966-8761 (fax), [karen.mosier@usask.ca](mailto:karen.mosier@usask.ca) (e-mail), <http://www.medicine.usask.ca/psychiatry/wpa2008/>.

**May 29–31**, International Congress of Dual Pathology 2008, Madrid. Contact: Technical Secretariat, Tlesa OPC, Londres, 17 - 28028, Madrid, Spain; (34) 91 361 12600 (tel), (34) 91 355 9208, [secretariat@cipd2008.com](mailto:secretariat@cipd2008.com) (e-mail), [www.cipd2008.com](http://www.cipd2008.com) (web site).

## JUNE

**June 18–22**, American Psychoanalytic Association 97th Annual Meeting, Atlanta, GA. Contact: Dottie Jeffries, Director of Public Affairs, (212) 752-0450 x29 (tel), [djeffries@apsa.org](mailto:djeffries@apsa.org) (e-mail).

**June 19–22**, Annual Meeting of the Society for the Study of Psychiatry and Culture, "The Cultural Formulation and Cultural/Gender Issues in DSM-V," San Francisco, CA. Contact: Jim Boehnlein, M.D., Oregon Health and Science University, (505) 494-6653 (tel), [sspadmin@gmail.com](mailto:sspadmin@gmail.com) (e-mail) or Francis Lu, M.D. [francis.lu@sfglh.org](mailto:francis.lu@sfglh.org) (e-mail)

**June 19–21**, Thematic Conference on Depression and Relevant Psychiatric Condition in Primary Care, Granada, Spain. Contact: Francisco Torres-González, Andalusian Research Group on Mental Health, University of Granada, Avenida de Madrid 11, Granada 18071, Spain; (34) 958-272651 (tel), (34) 958-275214 (fax), [ftorres@ugr.es](mailto:ftorres@ugr.es) (e-mail).

**June 21–25**, 1st Schizophrenia International Research Society Conference, Venice, Italy. Contact: Schizophrenia International Research Society, [schizophreniasoc@aol.com](mailto:schizophreniasoc@aol.com) (e-mail), [www.schizophreniaconference.org](http://www.schizophreniaconference.org) (web site)

## OCTOBER

**October 2–5**, 60th Institute on Psychiatric Services, American Psychiatric Association, Chicago, IL. Contact: Jill Gruber, APA Annual Meetings Dept., 1000 Wilson Blvd., Ste. 1825, Arlington, VA 22209; (703) 907-7815.

**October 28–November 2**, 55th Annual Meeting of the American Academy of Child and Adolescent Psychiatry, Chicago. Contact: AACAP, 3615 Wisconsin Avenue, N.W., Washington, DC 20016-3007; (202) 966-7300 (tel),

Continued on page A48

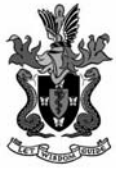

# THE BRITISH JOURNAL OF PSYCHIATRY

February 2008, VOL. 192

- A4 Editorial Board**
- A6 Highlights of this issue**
- Editorials**
- 83 The classification of depression: are we still confused?**  
J. Cole, P. McGuffin and A.E. Farmer
- 86 Metabotropic glutamate receptor agonists for schizophrenia**  
P.J. Harrison
- Special article**
- 88 Improved investment in mental health services: value for money?**  
D. Goldberg
- Review article**
- 92 Semantic priming in schizophrenia: systematic review and meta-analysis**  
E. Pomarol-Clotet, T.M.S.S. Oh, K.R. Laws, and P.J. McKenna
- Papers**
- 98 Cross-national prevalence and risk factors for suicidal ideation, plans and attempts**  
M.K. Nock, G. Borges, E.J. Bromet, J. Alonso, M. Angermeyer, A. Beautrais, R. Bruffaerts, W.T. Chiu, G. de Girolamo, S. Gluzman, R. de Graaf, O. Gureje, J.M. Haro, Y. Huang, E. Karam, R.C. Kessler, J.P. Lepine, D. Levinson, M.E. Medina-Mora, Y. Ono, J. Posada-Villa, and D. Williams
- 105 Word pictures of depression: anhedonia**  
S. McConville
- 106 Area factors and suicide: 5-year follow-up of the Northern Ireland population**  
D. O'Reilly, M. Rosato, S. Connolly, and C. Cardwell
- 111 Word pictures of depression: tearfulness**  
S. McConville
- 112 Lifetime prevalence of psychiatric disorders in South Africa**  
D.J. Stein, S. Seedat, A. Herman, H. Moomal, S.G. Heeringa, R.C. Kessler, and D.R. Williams
- 117 Dementia with Lewy bodies - in 100 words**  
I. McKeith
- 118 Attention-deficit hyperactivity disorder as a potentially aggravating factor in borderline personality disorder**  
A. Philipsen, M.F. Limberger, K. Lieb, B. Feige, N. Kleindienst, U. Ebner-Priemer, J. Barth, C. Schmahl, and M. Bohus
- 123 The medical certificates of admission papers - 150 years ago**  
Researched by T.H. Turner
- 124 Antidepressant medications v. cognitive therapy in people with depression with or without personality disorder**  
J.C. Fournier, R.J. DeRubeis, R.C. Shelton, R. Gallop, J.D. Amsterdam, and S.D. Hollon
- 130 Comparative randomised trial of online cognitive-behavioural therapy and an information website for depression: 12-month outcomes**  
A. Mackinnon, K.M. Griffiths, and H. Christensen
- 135 Olanzapine plus carbamazepine v. carbamazepine alone in treating manic episodes**  
M. Tohen, C.L. Bowden, A.B. Smulevich, R. Bergstrom, T. Quinlan, O. Osuntokun, W.V. Wang, H.S. Oliff, F. Martenyi, L.A. Kryzhanovskaya, and W. Greil
- 144 Influences on young people's stigmatising attitudes towards peers with mental disorders: national survey of young Australians and their parents**  
A.F. Jorm and A. Wright
- 149 I am by John Clare**  
R. Howard
- Short reports**
- 150 Incidence of childhood-onset bipolar illness in the USA and Europe**  
R.M. Post, D.A. Luckenbaugh, G.S. Leverich, L.L. Altshuler, M.A. Frye, T. Suppes, P.E. Keck, S.L. McElroy, W.A. Nolen, R. Kupka, H. Grunze, and J. Walden
- 152 Childhood and adulthood socio-economic position and midlife depressive and anxiety disorders**  
S.A. Stansfeld, C. Clark, B. Rodgers, T. Caldwell, and C. Power
- Columns**
- 154 Correspondence**
- 155 Book reviews**
- 158 Contents of the American Journal of Psychiatry**
- 159 Contents of Advances in Psychiatric Treatment**
- 160 From the Editor's desk**

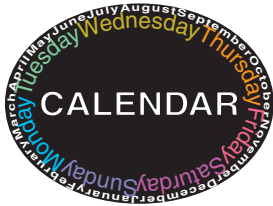

Continued from page A22

(202) 966-2891 (fax), meetings@aacap.org (e-mail), www.aacap.org (web site).

## NOVEMBER

**November 23–28**, Canadian Psychiatric Association 58th Annual Meeting, Vancouver, British Columbia, Canada. Contact: 260-441 MacLaren Street, Ottawa, ON K2P 2H3, Canada; (800) 267-1555 (tel), (613) 234-9857 (fax), cpa@medical.org (e-mail).

## FEBRUARY 2009

**February 25–March 1**, American College of Psychiatrists Annual Meeting, Tucson, AZ. Contact: 122 South Michigan Avenue, Suite 1360, Chicago, IL 60603; (312) 662-1020 (tel), (312) 662-1025 (fax), angel@ACPsych.org (e-mail).

## MAY

**May 16–21**, 162nd Annual Meeting of the American Psychiatric Association, San Francisco. Contact: Cathy Nash, APA Annual Meetings Dept., 1000 Wilson Blvd., Ste. 1825, Arlington, VA 22209; (703) 907-7822.

**FREE AUDIO! Have You Heard?**

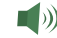

You can listen to highlights of *The American Journal of Psychiatry* by downloading a monthly free .mp3 audio file from our website (<http://ajp.psychiatryonline.org/misc/audio.dtl>) or by subscribing to the AJP Audio podcast at iTunes or other feed reader.

## Continuing Medical Education

Three articles in each issue provide an opportunity to earn up to 1 hour category 1 **CME** credit each by taking a course covering the content. Credit available online only with purchased subscription to AJP's CME program. Visit [cme.psychiatryonline.org](http://cme.psychiatryonline.org) for details.

Coming in the April 2008 issue\*

## THE AMERICAN JOURNAL OF PSYCHIATRY

### *Fluoxetine Versus Placebo in Preventing Relapse of Major Depression in Children and Adolescents*

G. Emslie, B. Kennard, T. Mayes, J. Nightingale-Teresi, T. Carmody, C. Hughes, J. Rush, R. Tao, and J. Rintelmann

### *Systems Training for Emotional Predictability and Problem Solving (STEPPS) for Outpatients With Borderline Personality Disorder: A Randomized Controlled Trial and 1-year Follow-Up*

N. Blum, D. St. John, B. Pfohl, S. Stuart, B. McCormick, J. Allen, S. Arndt, and D. Black

### *Conserved Regional Patterns of GABA-Related Transcript Expression in the Neocortex of Subjects With Schizophrenia*

T. Hashimoto, H.H. Bazmi, K. Mirnics, Q. Wu, A. Sampson, and D. Lewis

### *Excessive Brain Volume Loss Over Time in Cannabis-Using First-Episode Schizophrenia Patients*

M. Rais, W. Cahn, N. van Haren, H. Schnack, E. Caspers, H. Hulshoff Pol, and R. Kahn

\*Can't wait? Visit [ajp.psychiatryonline.org](http://ajp.psychiatryonline.org) and click the "AJP in Advance" logo to see all articles uploaded in advance of print!
